# Supplementary material for: Redefining the Clostridioides difficile σB Regulon: σB Activates Genes Involved in Detoxifying Radicals That Can Result from the Exposure to Antimicrobials and Hydrogen Peroxide
Source: PubMed Central journal article supplement (PMC7494833; doi:10.1128/msphere.00728-20), 2020-09-16
Supplement: mSphere.00728-20-s0001.pdf [file mSphere.00728-20-s0001.pdf]

LINK:

[https://huygens.science.uva.nl/VolcaNoseR/?data=5;;log2FC;significance;locus\\_tag&vis=4;0.5;-1.5,1.5;1.3;significant;manh&can=10;;;CD630DERM\\_02390,CD630DERM\\_02430,CD630DERM\\_02290,CD630DERM\\_02500&layout=;;TRUE;-5,10;0,8;X;600;800&color=1;none&label=TRUE;Differential expression \(sigB OE/ctrl\) in the presence of thiamphenicol;TRUE;log2\(FC\);-10log\(adj\\_Pvalue\);TRUE;24;24;18;4;&url=https://tinyurl.com/y9abwbsb](https://huygens.science.uva.nl/VolcaNoseR/?data=5;;log2FC;significance;locus_tag&vis=4;0.5;-1.5,1.5;1.3;significant;manh&can=10;;;CD630DERM_02390,CD630DERM_02430,CD630DERM_02290,CD630DERM_02500&layout=;;TRUE;-5,10;0,8;X;600;800&color=1;none&label=TRUE;Differential expression (sigB OE/ctrl) in the presence of thiamphenicol;TRUE;log2(FC);-10log(adj_Pvalue);TRUE;24;24;18;4;&url=https://tinyurl.com/y9abwbsb)

BACKUP LINK:

[https://huygens.science.uva.nl/VolcaNoseR2/?data=5;;log2FC;significance;locus\\_tag&vis=4;0.5;-1.5,1.5;1.3;significant;manh&can=10;;;CD630DERM\\_02390,CD630DERM\\_02430,CD630DERM\\_02290,CD630DERM\\_02500&layout=;;TRUE;-5,10;0,8;X;600;800&color=1;none&label=TRUE;Differential expression \(sigB OE/ctrl\) in the presence of thiamphenicol;TRUE;log2\(FC\);-10log\(adj\\_Pvalue\);TRUE;24;24;18;4;&url=https://tinyurl.com/y9abwbsb](https://huygens.science.uva.nl/VolcaNoseR2/?data=5;;log2FC;significance;locus_tag&vis=4;0.5;-1.5,1.5;1.3;significant;manh&can=10;;;CD630DERM_02390,CD630DERM_02430,CD630DERM_02290,CD630DERM_02500&layout=;;TRUE;-5,10;0,8;X;600;800&color=1;none&label=TRUE;Differential expression (sigB OE/ctrl) in the presence of thiamphenicol;TRUE;log2(FC);-10log(adj_Pvalue);TRUE;24;24;18;4;&url=https://tinyurl.com/y9abwbsb)

ALTERNATIVE BACKUP LINK:

[http://goedhart.shinyapps.io/VolcaNoseR/?data=5;;log2FC;significance;locus\\_tag&vis=4;0.5;-1.5,1.5;1.3;significant;manh&can=10;;;CD630DERM\\_02390,CD630DERM\\_02430,CD630DERM\\_02290,CD630DERM\\_02500&layout=;;TRUE;-5,10;0,8;X;600;800&color=1;none&label=TRUE;Differential expression \(sigB OE/ctrl\) in the presence of thiamphenicol;TRUE;log2\(FC\);-10log\(adj\\_Pvalue\);TRUE;24;24;18;4;&url=https://tinyurl.com/y9abwbsb](http://goedhart.shinyapps.io/VolcaNoseR/?data=5;;log2FC;significance;locus_tag&vis=4;0.5;-1.5,1.5;1.3;significant;manh&can=10;;;CD630DERM_02390,CD630DERM_02430,CD630DERM_02290,CD630DERM_02500&layout=;;TRUE;-5,10;0,8;X;600;800&color=1;none&label=TRUE;Differential expression (sigB OE/ctrl) in the presence of thiamphenicol;TRUE;log2(FC);-10log(adj_Pvalue);TRUE;24;24;18;4;&url=https://tinyurl.com/y9abwbsb)
